# Supplementary material for: Effects of texture properties of semi-solid food on the sensory test for pharyngeal swallowing effort in the older adults
Source: PubMed Central journal article supplement (PMC7684931; doi:10.1186/s12877-020-01890-4), 2020-11-23
Supplement: 12877_2020_1890_MOESM1_ESM.pdf [file 12877_2020_1890_MOESM1_ESM.pdf]

**<Food 1>**

1. How difficult is it to swallow this food?

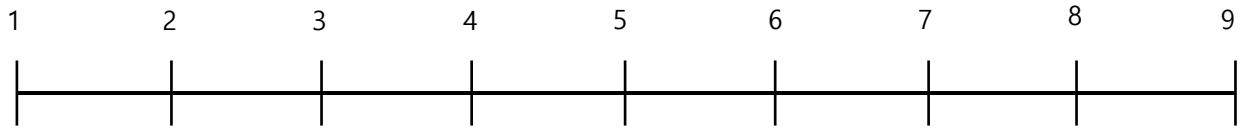

Very easy

Usually

Very difficult

2. How much food remains in the pharynx after swallowing?

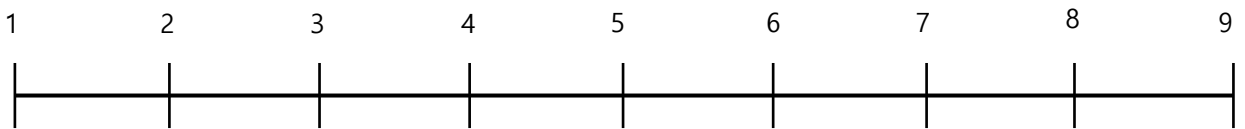

Very less

Usually

Very many
